# Supplementary material
Source: PubMed Central journal article supplement (PMC8387492)

### APPENDIX 3: ADDITIONAL TABLES & FIGURES FOR THE NETWORK ANALYSES

#### i) Network Analysis of BD & No BD

**Table 1S: Centrality measures per variable (bold text indicates the ‘top 4’ i.e. the variables that differ most between the two networks)**

| Variable                                 | No BD         |               |               | BD            |               |              |
|------------------------------------------|---------------|---------------|---------------|---------------|---------------|--------------|
|                                          | Betweenness   | Closeness     | Strength      | Betweenness   | Closeness     | Strength     |
| Nervous/Tense (D1)                       | -1.064        | -1.809        | -1.559        | -0.369        | -0.527        | -0.486       |
| Unhappy/Depressed (D2)                   | -1.064        | -0.265        | -0.434        | 0.107         | 0.200         | -0.095       |
| Feel Stressed (D3)                       | -0.195        | -0.752        | -0.356        | -0.369        | -0.234        | -0.653       |
| Feel Overwhelmed (D4)                    | -1.064        | -1.483        | -0.929        | -1.560        | -2.048        | -1.597       |
| <b>Loss of Confidence (D5)</b>           | <b>1.831</b>  | <b>1.411</b>  | <b>1.657</b>  | <b>0.822</b>  | <b>0.292</b>  | <b>0.100</b> |
| Hopelessness (D6)                        | -0.775        | -0.321        | -1.528        | -1.084        | -2.351        | -1.956       |
| Somatic Pain (D7)                        | -0.340        | 0.908         | 1.473         | -0.369        | 0.456         | -0.218       |
| <b>Hypersomnia (D8)</b>                  | <b>1.831</b>  | <b>0.956</b>  | <b>0.853</b>  | <b>2.013</b>  | <b>0.744</b>  | <b>1.539</b> |
| Fatigue (D9)                             | -0.340        | 0.515         | 0.138         | -1.322        | -0.707        | -0.680       |
| Impaired Sleep Quality (D10)             | -0.775        | 0.923         | 0.679         | -0.607        | 0.135         | 0.742        |
| Impaired Concentration (D11)             | 0.384         | 0.781         | -0.035        | 0.345         | 0.388         | 0.136        |
| <b>Anergia (D12)</b>                     | <b>-0.195</b> | <b>1.011</b>  | <b>0.449</b>  | <b>2.251</b>  | <b>2.132</b>  | <b>1.791</b> |
| Feeling Elated (HM1)                     | 0.963         | 0.232         | 0.632         | -1.084        | -0.708        | -0.865       |
| Increased Self-Esteem (HM2)              | -0.485        | -0.789        | -0.495        | 0.107         | -0.473        | -0.837       |
| Impaired Sleep (Reduced) HM3             | -1.064        | -2.004        | -1.398        | 0.584         | -0.013        | -0.508       |
| <b>Increased Psychomotor Speed (HM4)</b> | <b>-0.485</b> | <b>-0.721</b> | <b>-1.183</b> | <b>-0.607</b> | <b>-0.020</b> | <b>0.576</b> |
| Increased Activity (HM5)                 | 0.239         | -0.109        | 0.117         | 0.345         | 0.506         | 0.390        |
| Hearing Voices when alone (P3)           | 2.121         | 0.933         | 1.176         | 0.822         | 0.881         | 1.607        |
| Feeling Threatened by Others (P4)        | 0.094         | 0.139         | -0.355        | 0.345         | 0.977         | 0.494        |
| Thinking People are Against You (P5)     | 0.384         | 0.443         | 1.099         | -0.369        | 0.369         | 0.519        |

### Figure 1S: Edge Stability

In the following diagrams the solid lines represent the strength of correlation & the shaded areas indicate the 95% confidence intervals.

#### a) BD

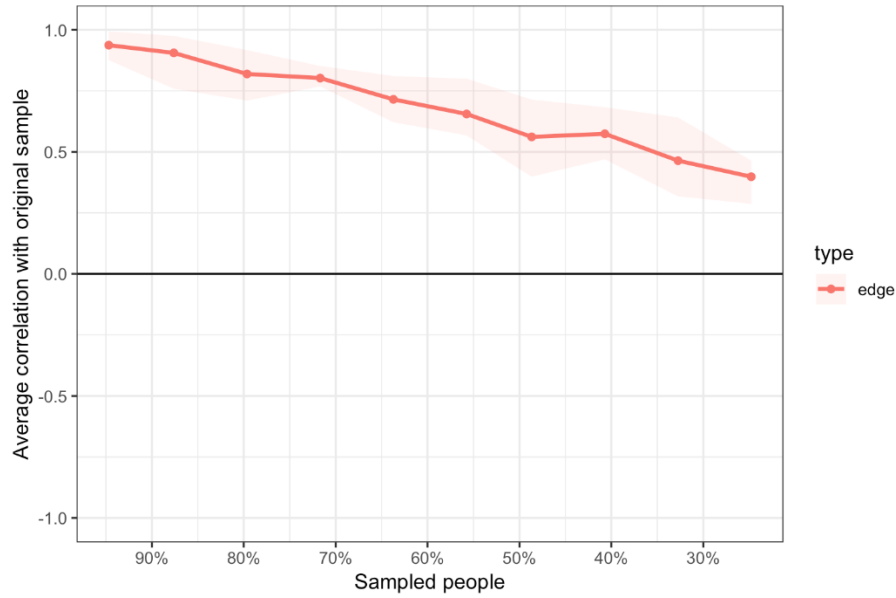

#### b) NO BD

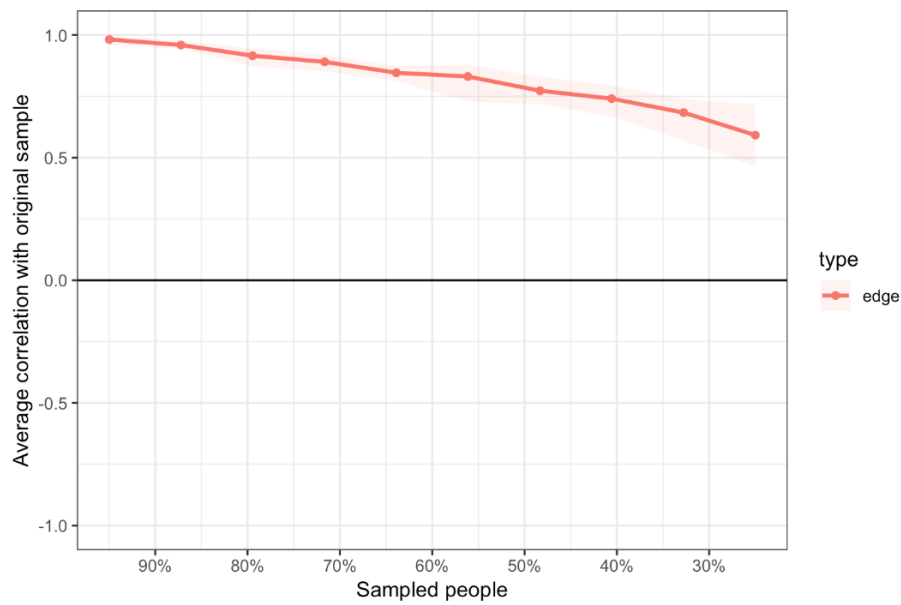

Figure 2S: Centrality Stability

a) BD

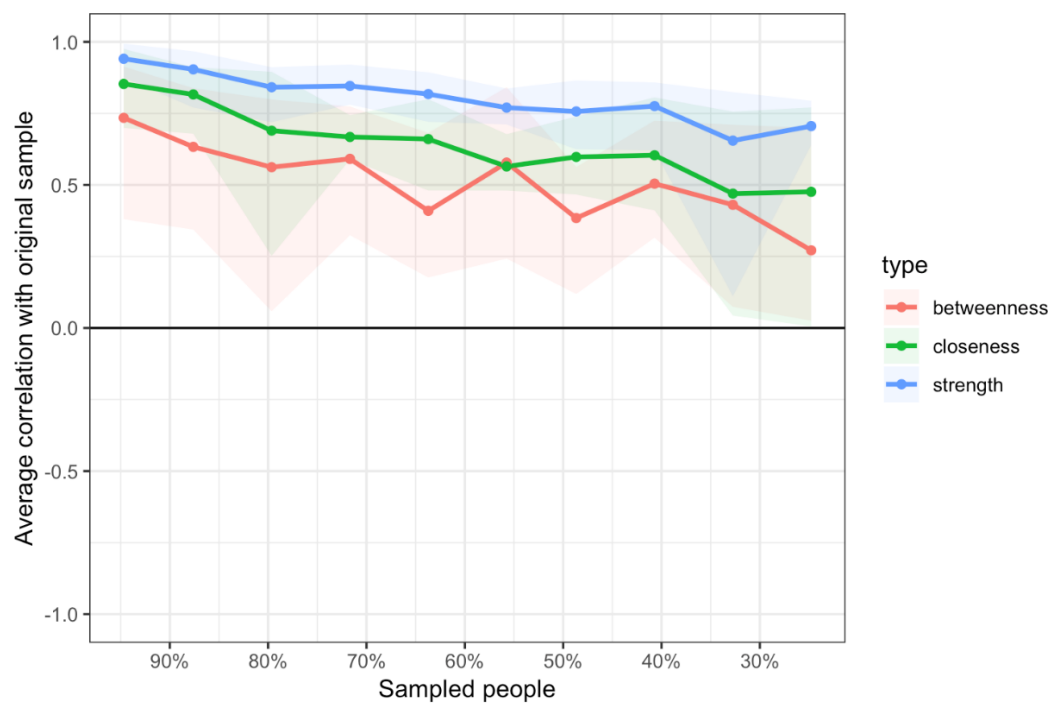

b) NO BD

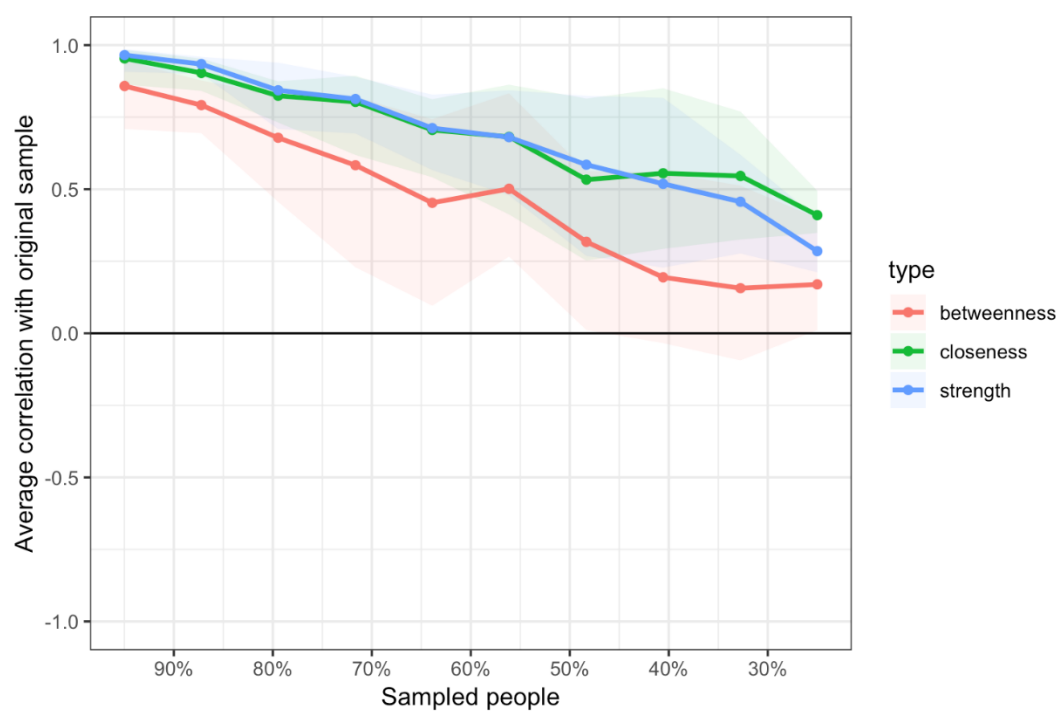

ii) Network Analysis of unipolar depression with or without a family history of bipolar disorder (FH BD)

**Table 2S: Centrality measures per variable (bold text indicates the ‘top 4’ i.e. the variables that differ most between the two networks)**

| Variable                                 | No FH BD      |               |               | FH BD        |              |              |
|------------------------------------------|---------------|---------------|---------------|--------------|--------------|--------------|
|                                          | Betweenness   | Closeness     | Strength      | Betweenness  | Closeness    | Strength     |
| Nervous/Tense (D1)                       | -0.906        | 0.176         | 0.213         | -0.714       | -0.144       | 0.035        |
| Unhappy/Depressed (D2)                   | 0.398         | -0.325        | 0.108         | -0.276       | 0.291        | 0.110        |
| Feel Stressed (D3)                       | -0.645        | 1.210         | 1.113         | -0.714       | -0.685       | -0.490       |
| Feel Overwhelmed (D4)                    | 1.702         | 1.665         | 1.147         | -0.058       | -0.207       | -0.320       |
| Loss of Confidence (D5)                  | 0.398         | 0.131         | 0.050         | -1.152       | -0.511       | -0.870       |
| <b>Hopelessness (D6)</b>                 | <b>-0.384</b> | <b>-2.307</b> | <b>-2.404</b> | <b>1.037</b> | <b>0.886</b> | <b>0.978</b> |
| Somatic Pain (D7)                        | -0.906        | -0.115        | 0.561         | -0.714       | -1.093       | -1.058       |
| Hypersomnia (D8)                         | -0.906        | 0.361         | 0.233         | 0.380        | 1.166        | 0.753        |
| Fatigue (D9)                             | 0.137         | 0.856         | 0.995         | 0.161        | -0.354       | -0.188       |
| Impaired Sleep Quality (D10)             | -0.906        | -2.048        | -2.071        | -0.933       | -0.871       | -0.583       |
| <b>Impaired Concentration (D11)</b>      | <b>-0.124</b> | <b>0.820</b>  | <b>0.628</b>  | <b>1.037</b> | <b>0.921</b> | <b>1.426</b> |
| <b>Anergia (D12)</b>                     | <b>1.180</b>  | <b>-0.130</b> | <b>-0.519</b> | <b>3.007</b> | <b>2.611</b> | <b>2.304</b> |
| Feeling Elated (HM1)                     | -0.906        | 0.003         | 0.675         | -0.933       | -1.679       | -1.123       |
| Increased Self-Esteem (HM2)              | -0.124        | -0.316        | -0.731        | -1.152       | -0.976       | -0.492       |
| Impaired Sleep (Reduced) HM3             | 1.180         | 0.503         | 0.410         | 0.161        | 0.147        | 0.871        |
| <b>Increased Psychomotor Speed (HM4)</b> | <b>-0.906</b> | <b>-0.482</b> | <b>-0.833</b> | <b>0.161</b> | <b>0.414</b> | <b>0.826</b> |
| Increased Activity (HM5)                 | -0.384        | -0.485        | -0.623        | -0.276       | -0.810       | -1.463       |
| Feeling Threatened by Others (P4)        | 2.484         | 1.133         | 1.028         | 0.380        | 0.772        | 0.412        |
| Thinking People are Against You (P5)     | -0.384        | -0.651        | 0.019         | 0.599        | 0.123        | -1.127       |

### Figure 3S: Edge Stability

In the following diagrams the solid lines represent the strength of correlation & the shaded areas indicate the 95% confidence intervals.

#### a) FH BD

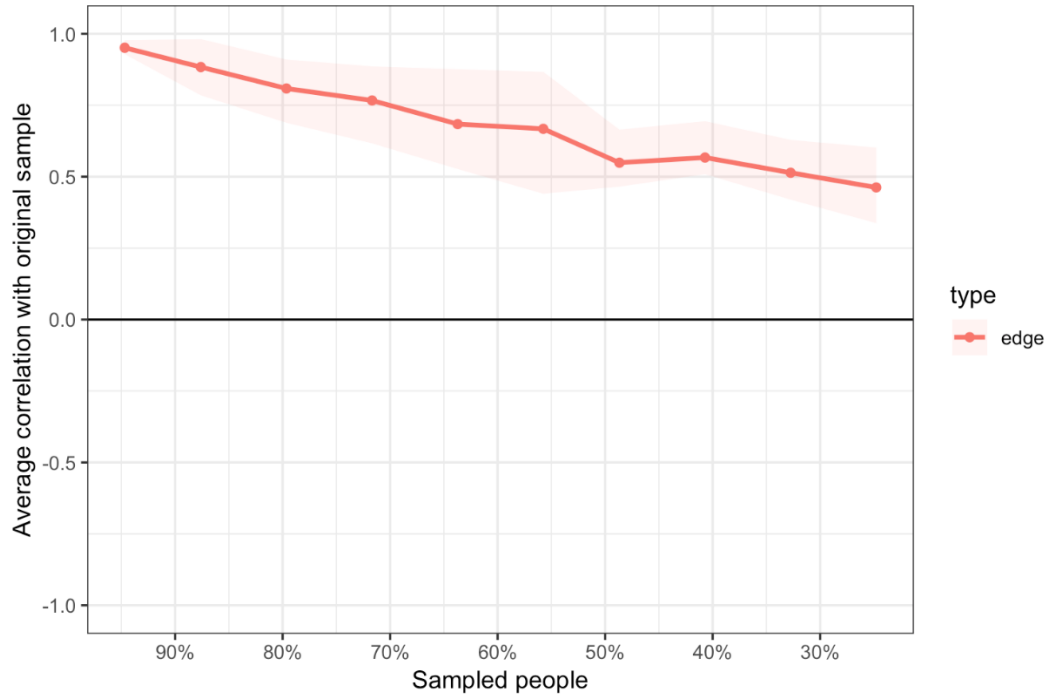

#### b) No FH BD

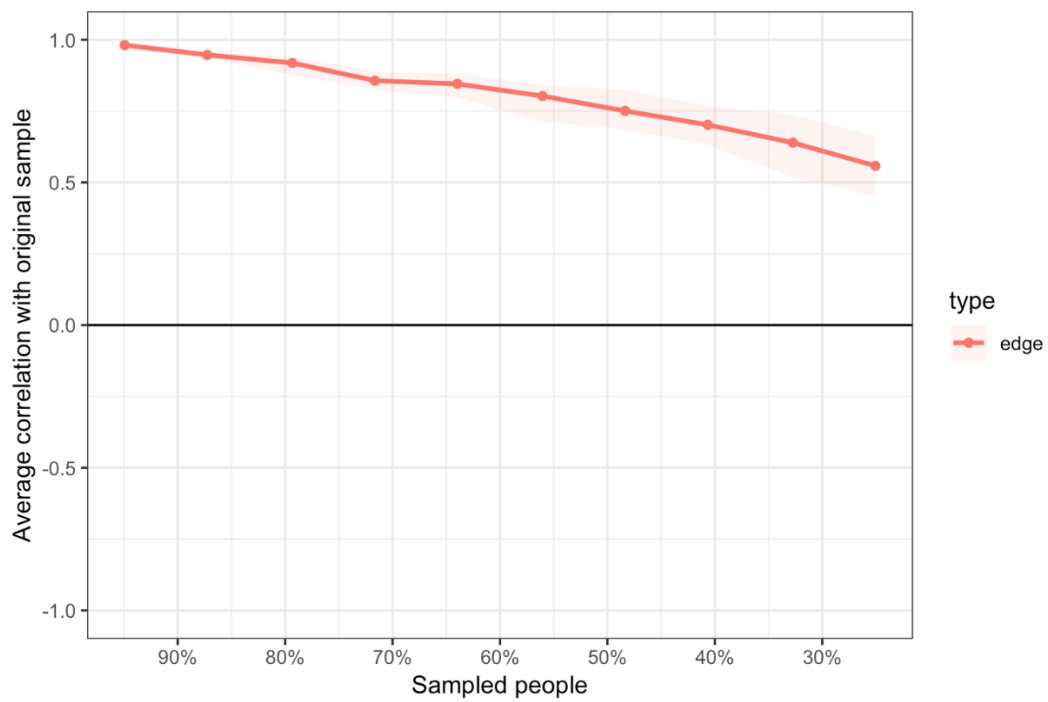

Figure 4S: Centrality Stability

a) FH BD

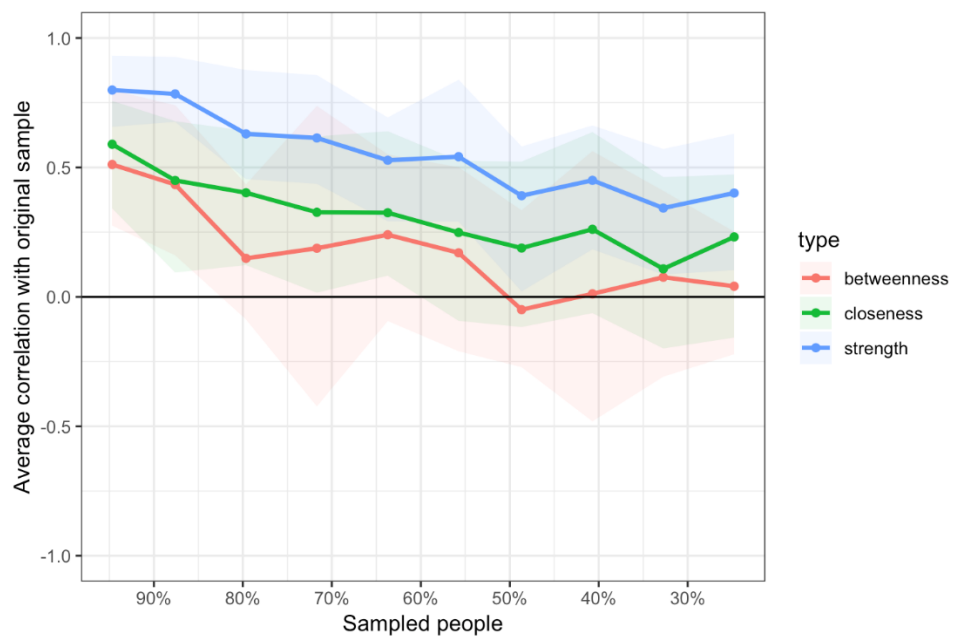

b) No FH BD

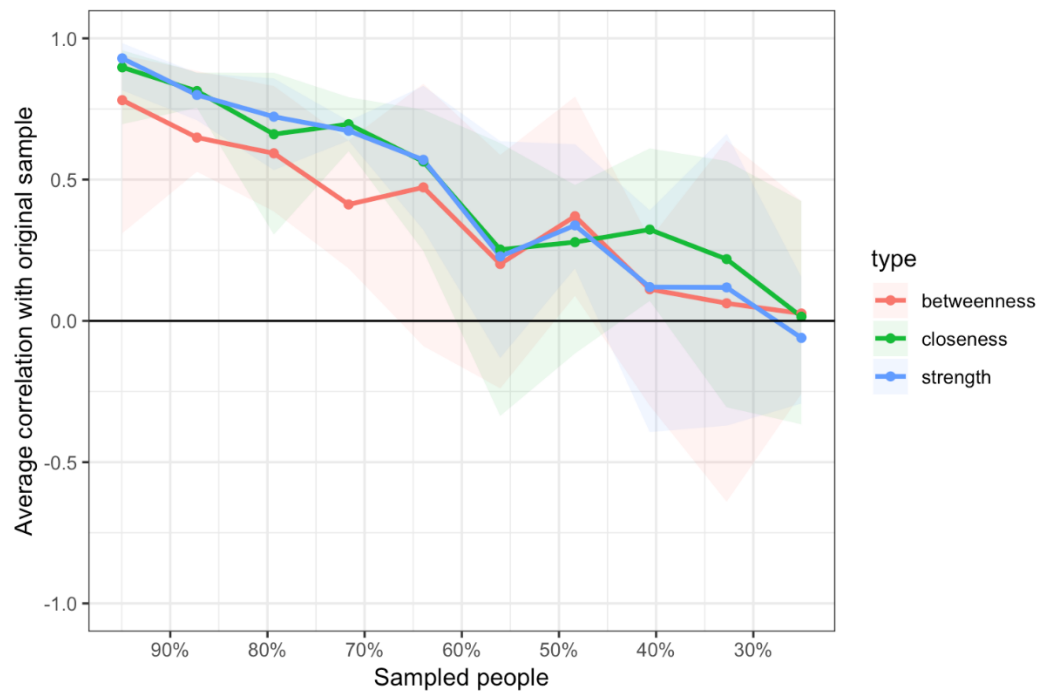

Supplement: NIHMS1679169-supplement-APP_3.pdf [file NIHMS1679169-supplement-APP_3.pdf]
